# Supplementary material for: Interface modification with PCBM intermediate layers for planar formamidinium perovskite solar cells
Source: Royal Society of Chemistry journal article supplement (doi:10.1039/c7ra04311b), 2017-01-01
Supplement: c7ra04311b1.pdf [file c7ra04311b1.pdf]

## Electronic Supplementary Information

### Interface Modification with PCBM Intermediate Layers for Planar Formamidinium Perovskite Solar Cells

Hongcui Li,<sup>a</sup> Yebin Xue,<sup>a</sup> Bo Zheng,<sup>a</sup> Jiaqi Tian,<sup>a</sup> Haiyue Wang,<sup>a</sup> Chunxiao Gao,<sup>b</sup> and Xizhe Liu<sup>a,\*</sup>

<sup>a</sup> Institute of Atomic and Molecular Physics, Jilin Provincial Key Laboratory of Applied Atomic and Molecular Spectroscopy, Jilin University, Changchun, 130012, China

<sup>b</sup> State Key Laboratory for Superhard Materials, Jilin University, Changchun, 130012, China

\* Corresponding Author. Tel: +86-43185168817, E-mail address: (L. X.) liu\_xizhe@jlu.edu.cn

## Tables

**Table S1.** The photovoltaic parameters of the planar formamidinium perovskite solar cells without and with different PCBM intermediate layers.

| Solar cell | $V_{oc}$ (V) | $J_{sc}$ (mA cm <sup>-2</sup> ) | FF    | PCE (%) |
|------------|--------------|---------------------------------|-------|---------|
| w/o PCBM   | 1.08         | 12.3                            | 0.497 | 6.6     |
| PCBM10     | 1.03         | 16.7                            | 0.603 | 10.4    |
| PCBM20     | 1.06         | 19.7                            | 0.599 | 12.5    |
| PCBM30     | 1.05         | 22.7                            | 0.653 | 15.5    |
| PCBM40     | 1.05         | 18.1                            | 0.642 | 12.2    |

**Table S2.** The extracted parameters from impedance data by fitting with equivalent circuit.

| Solar cell | $R_{ct}$ ( $\Omega$ cm <sup>2</sup> ) | $R_{rec}$ ( $\Omega$ cm <sup>2</sup> ) |
|------------|---------------------------------------|----------------------------------------|
| w/o PCBM   | 3.7                                   | 40.3                                   |
| PCBM10     | 22.0                                  | 631.7                                  |
| PCBM20     | 29.6                                  | 839.2                                  |
| PCBM30     | 40.0                                  | 1236.3                                 |
| PCBM40     | 706.4                                 | 1215.4                                 |

**Table S3.** Parameters for planar junction device with PCBM30 intermediate layer and conventional device with mesoporous TiO<sub>2</sub> layer under both forward and reverse scans.

| Solar cell      | Scan direction | $V_{oc}$ (V) | $J_{sc}$ (mA cm <sup>-2</sup> ) | FF    | PCE (%) |
|-----------------|----------------|--------------|---------------------------------|-------|---------|
| With PCBM30     | Reverse        | 1.04         | 22.56                           | 0.691 | 16.23   |
|                 | Forward        | 1.04         | 22.64                           | 0.687 | 16.20   |
| With mesoporous | Reverse        | 1.02         | 22.32                           | 0.661 | 15.08   |
|                 | Forward        | 0.928        | 22.38                           | 0.519 | 10.78   |

## Figures

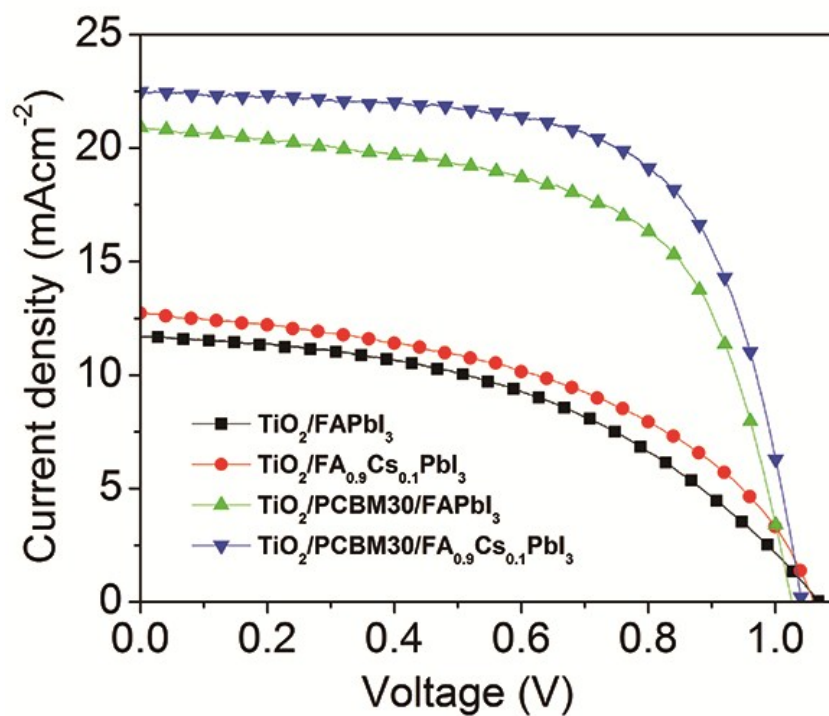

**Figure S1.** J-V curves of devices without and with PCBM30 intermediate layer. The planar devices are fabricated with both pure FAPbI<sub>3</sub> layers and 10 at% CsI doped FAPbI<sub>3</sub> layers as light harvesters. It indicates that CsI doping can improve the performance of planar devices. And it is also noted that PCBM30 intermediate layers have similar effect on the performance promotion for devices with both undoped and CsI doped FAPbI<sub>3</sub> layers as light harvesters.

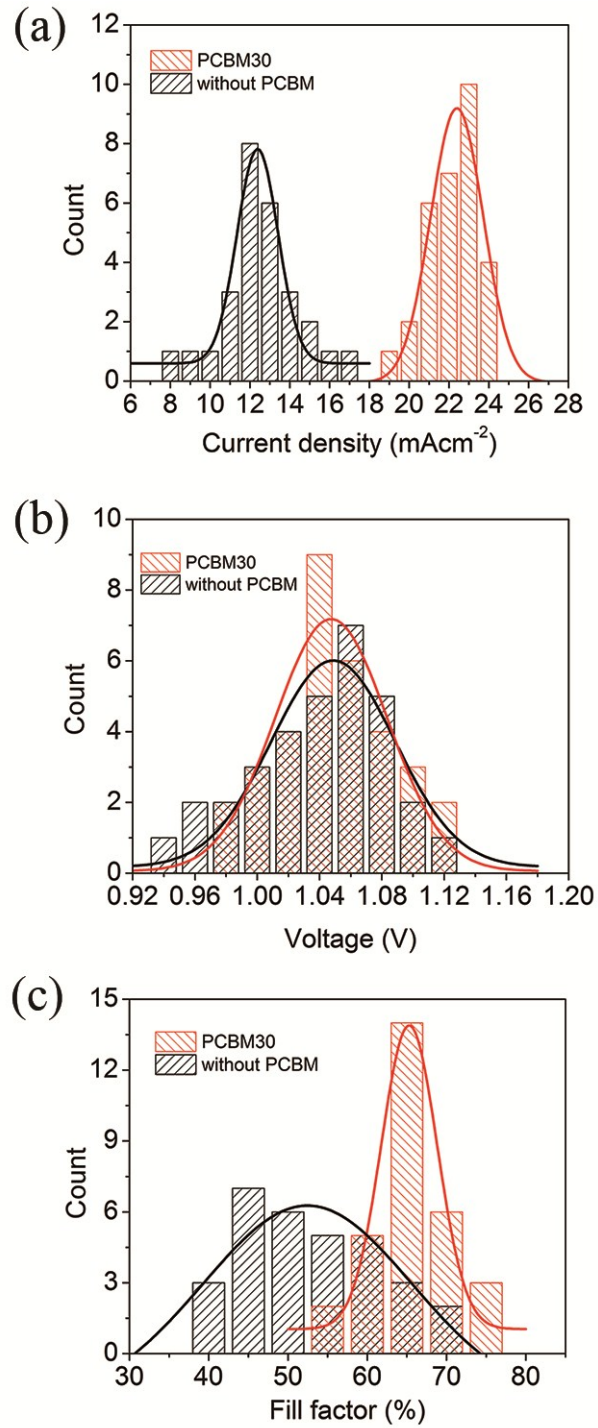

**Figure S2.** Statistics of  $J_{SC}$ ,  $V_{OC}$ , and FF for the devices without and with PCBM30 intermediate layers.

It is noted that devices with and without PCBM30 intermediate layers have similar  $V_{OC}$  in Figure S2b. By adding PCBM30 intermediate layers, the large perovskite grains of light harvester layers can improve the transport/recombination process (figure 3), which is beneficial for achieving high  $V_{OC}$ . On the other hand, the PL and impedance measurements (figure 6 and 7) indicate that PCBM30 layer slightly retard the interface charge transfer process, which leads to a decrease of  $V_{OC}$ . The ultimate performance of devices is determined by both the transport/recombination process and interface charge transfer process. The similar  $V_{OC}$  in statistic data of both devices without/with PCBM30 layers can be attributed to the balanced between these two processes.

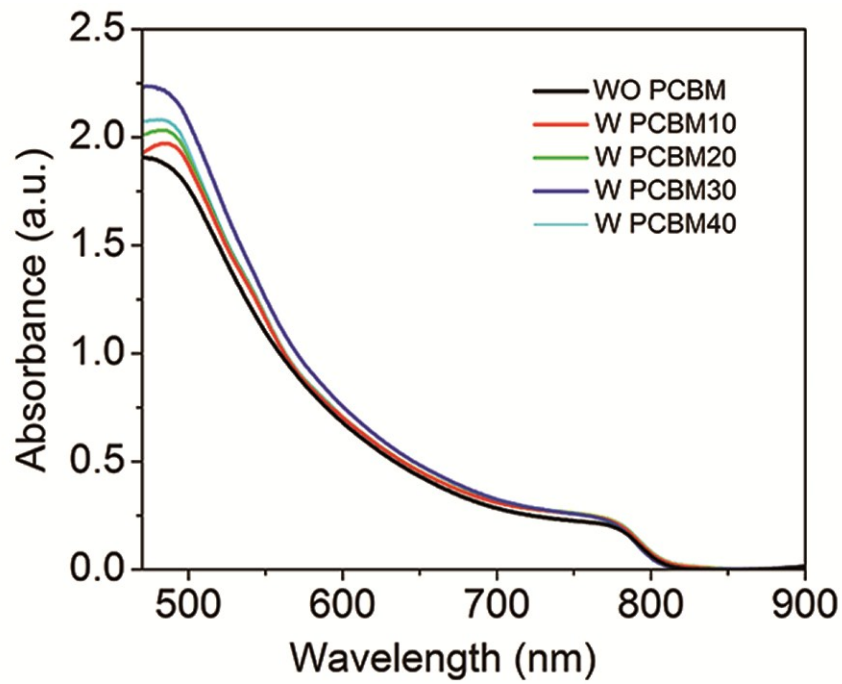

**Figure S3.** UV-vis absorption spectra of perovskite layers without and with different PCBM intermediate layers.

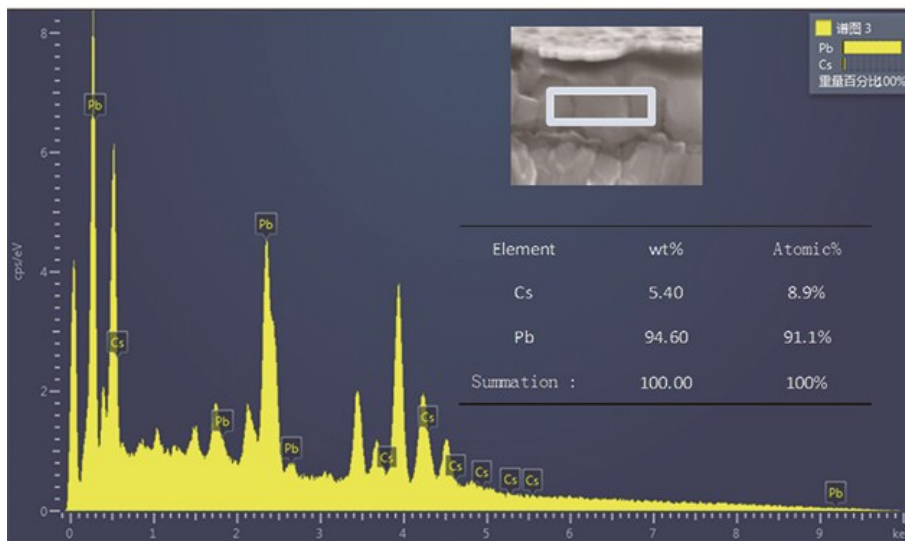

**Figure S4.** Energy dispersive x-ray spectrum (EDS) of CsI doped FAPbI<sub>3</sub> layer, and the ratio of Pb to Cs is shown in the table.

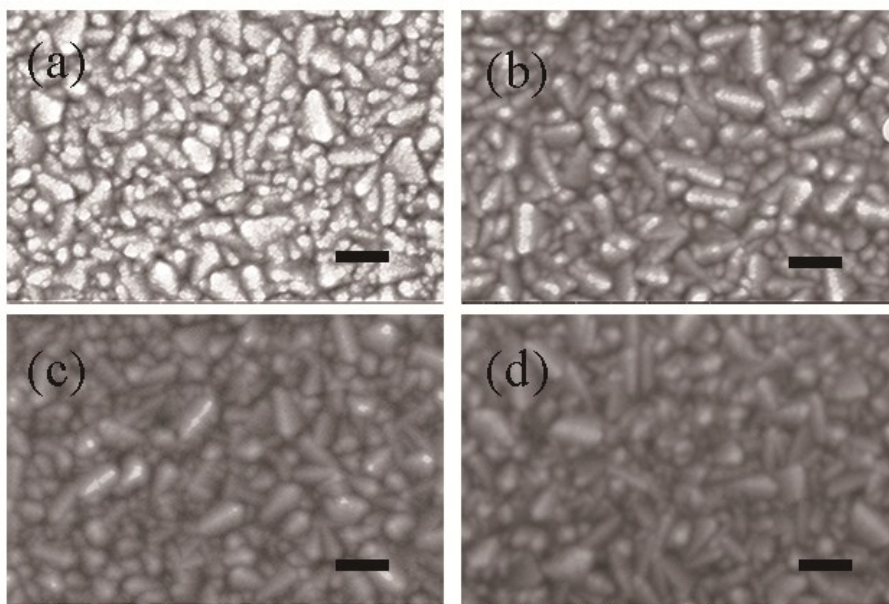

**Figure S5.** Top view SEM images of (a) PCBM10, (b) PCBM20, (c) PCBM30, and (d) PCBM40 intermediate layers on the  $\text{TiO}_2$  coated FTO substrates. The scale bar is 500 nm.
